# Supplementary material
Source: publisher figshare collection journal article supplement (https://sage.figshare.com/ndownloader/files/18109715)
Supplement: Supplementary file 1 [file 18109715]

## Appendix 1: Civic Party Typology

| Party Category   | Definition                                                                                                                  | Characteristics                                                                                                                                                                                                                                                                                                                                                                                                                                                                                                                                                                                                                                                  | Type                                                                                                                 | Distinction                                                                                                   | Examples                                                                                                                   |
|------------------|-----------------------------------------------------------------------------------------------------------------------------|------------------------------------------------------------------------------------------------------------------------------------------------------------------------------------------------------------------------------------------------------------------------------------------------------------------------------------------------------------------------------------------------------------------------------------------------------------------------------------------------------------------------------------------------------------------------------------------------------------------------------------------------------------------|----------------------------------------------------------------------------------------------------------------------|---------------------------------------------------------------------------------------------------------------|----------------------------------------------------------------------------------------------------------------------------|
| Accommodationist | Appeals to voters on both an individual and group basis in an attempt to accommodate the ethnic groups that make up society | <i>Programme:</i><br><br>Cross-community approach<br><br>Recognises distinct ethno-national identities and communities in society<br><br>Advances pluralist, multi-cultural policies<br><br>Recognition of group rights<br><br>Peace and reconciliation element to platform<br><br><i>Internal organisation:</i><br><br>Likely to operate internal quotas<br><br><i>Representation</i><br><br>Likely to take up seats reserved for ethnic representatives<br><br>Unlikely to oppose consociational power-sharing<br><br><i>Electoral mobilisation:</i><br><br>Likely to pursue a differentiated electoral strategy that takes ethnic representation into account | Multi-ethnic                                                                                                         | Resembles a coalition of separate ethnic groups that represent these groups internally on a pluralistic basis | SDP BiH<br><br>CNDD-FDD, Burundi<br><br>PDP, Nigeria<br><br>Congress Party, India<br><br>NLD, Myanmar<br><br>USDP, Myanmar |
|                  |                                                                                                                             | Cross-ethnic                                                                                                                                                                                                                                                                                                                                                                                                                                                                                                                                                                                                                                                     | Makes an explicit virtue of its attempt to reach across the ethnic divide as part of a broader reconciliation agenda | Northern Ireland Women’s Coalition<br><br>Former Democratic Party, South Africa                               |                                                                                                                            |

|                       |                                                                                                      |                                                                                                                                                                                                                                                                                                                                                                                                                                                                                                                                                                                                                                                                                                                   |             |                                                                                                                                                                                             |                                                                                                                                                   |
|-----------------------|------------------------------------------------------------------------------------------------------|-------------------------------------------------------------------------------------------------------------------------------------------------------------------------------------------------------------------------------------------------------------------------------------------------------------------------------------------------------------------------------------------------------------------------------------------------------------------------------------------------------------------------------------------------------------------------------------------------------------------------------------------------------------------------------------------------------------------|-------------|---------------------------------------------------------------------------------------------------------------------------------------------------------------------------------------------|---------------------------------------------------------------------------------------------------------------------------------------------------|
| <b>Integrationist</b> | Appeals to voters solely on an individual basis with little or no reference to ethnic group identity | <p><i>Programme:</i></p> <p>One-community approach</p> <p>Seeks to move beyond ethno-national division in society and politics</p> <p>Views identity as fluid, multiple and overlapping</p> <p>Advances integrationist policies</p> <p>Campaigns on alternative issues</p> <p>Emphasises individual human rights</p> <p><i>Internal organisation:</i></p> <p>Unlikely to operate internal quotas</p> <p><i>Representation:</i></p> <p>Likely to oppose consociational power-sharing</p> <p>Unlikely to take up positions reserved for ethnic representatives</p> <p><i>Electoral mobilisation:</i></p> <p>Likely to pursue a uniform electoral strategy that does not take ethnic representation into account</p> | Non-ethnic  | <p>Campaigns on alternative cleavages, attempting to transcend the ethnic cleavage and move towards a more issue-based politics</p>                                                         | <p>ANC, South Africa</p> <p>Former Communist Party, Cyprus</p> <p>Green Party, Northern Ireland</p> <p>People Before Profit, Northern Ireland</p> |
|                       |                                                                                                      |                                                                                                                                                                                                                                                                                                                                                                                                                                                                                                                                                                                                                                                                                                                   | Post-ethnic | <p>Recognises the ethnic divide in society but seeks to move beyond it, viewing ethnic identities as fluid and overlapping and advocating solidarity on issues of common civic interest</p> | <p>Alliance Party of Northern Ireland</p> <p>Naša Stranka, BiH</p>                                                                                |
